# Supplementary material for: A polynomial interactive reconstruction method based on spectral morphological features for the classification of gem minerals using portable LIBS
Source: Royal Society of Chemistry journal article supplement (doi:10.1039/d2ja00010e), 2022-01-01
Supplement: d2ja00010e1.pdf [file d2ja00010e1.pdf]

Appendix

|            |    | Predict class |    |    |    |    |    |    |    |    |    |    |    |    |    |    |    |    |    |    |    |    |    |    |    |
|------------|----|---------------|----|----|----|----|----|----|----|----|----|----|----|----|----|----|----|----|----|----|----|----|----|----|----|
|            |    | 1             | 2  | 3  | 4  | 5  | 6  | 7  | 8  | 9  | 10 | 11 | 12 | 13 | 14 | 15 | 16 | 17 | 18 | 19 | 20 | 21 | 22 | 23 | 24 |
| True class | 1  | 29            | 11 | 0  | 0  | 0  | 0  | 0  | 0  | 0  | 0  | 0  | 0  | 0  | 0  | 0  | 0  | 0  | 0  | 0  | 0  | 0  | 0  | 0  | 0  |
|            | 2  | 1             | 21 | 0  | 1  | 7  | 6  | 0  | 0  | 0  | 0  | 4  | 0  | 0  | 0  | 0  | 0  | 0  | 0  | 0  | 0  | 0  | 0  | 0  | 0  |
|            | 3  | 0             | 0  | 33 | 0  | 0  | 3  | 0  | 0  | 0  | 0  | 4  | 0  | 0  | 0  | 0  | 0  | 0  | 0  | 0  | 0  | 0  | 0  | 0  | 0  |
|            | 4  | 0             | 0  | 0  | 40 | 0  | 0  | 0  | 0  | 0  | 0  | 0  | 0  | 0  | 0  | 0  | 0  | 0  | 0  | 0  | 0  | 0  | 0  | 0  | 0  |
|            | 5  | 0             | 7  | 0  | 0  | 17 | 14 | 0  | 0  | 0  | 0  | 1  | 0  | 0  | 0  | 0  | 0  | 0  | 0  | 0  | 0  | 1  | 0  | 0  | 0  |
|            | 6  | 0             | 0  | 1  | 5  | 5  | 9  | 0  | 0  | 0  | 0  | 20 | 0  | 0  | 0  | 0  | 0  | 0  | 0  | 0  | 0  | 0  | 0  | 0  | 0  |
|            | 7  | 0             | 0  | 0  | 0  | 0  | 0  | 40 | 0  | 0  | 0  | 0  | 0  | 0  | 0  | 0  | 0  | 0  | 0  | 0  | 0  | 0  | 0  | 0  | 0  |
|            | 8  | 0             | 0  | 0  | 0  | 0  | 0  | 0  | 40 | 0  | 0  | 0  | 0  | 0  | 0  | 0  | 0  | 0  | 0  | 0  | 0  | 0  | 0  | 0  | 0  |
|            | 9  | 0             | 0  | 0  | 0  | 0  | 0  | 0  | 0  | 40 | 0  | 0  | 0  | 0  | 0  | 0  | 0  | 0  | 0  | 0  | 0  | 0  | 0  | 0  | 0  |
|            | 10 | 0             | 0  | 0  | 0  | 3  | 0  | 0  | 0  | 0  | 37 | 0  | 0  | 0  | 0  | 0  | 0  | 0  | 0  | 0  | 0  | 0  | 0  | 0  | 0  |
|            | 11 | 0             | 4  | 3  | 3  | 0  | 2  | 0  | 0  | 0  | 0  | 22 | 0  | 0  | 4  | 0  | 0  | 0  | 0  | 0  | 0  | 2  | 0  | 0  | 0  |
|            | 12 | 0             | 0  | 0  | 0  | 0  | 0  | 0  | 0  | 0  | 0  | 0  | 40 | 0  | 0  | 0  | 0  | 0  | 0  | 0  | 0  | 0  | 0  | 0  | 0  |
|            | 13 | 0             | 0  | 0  | 0  | 0  | 0  | 0  | 0  | 0  | 0  | 0  | 0  | 33 | 0  | 0  | 0  | 0  | 0  | 0  | 7  | 0  | 0  | 0  | 0  |
|            | 14 | 0             | 0  | 0  | 0  | 0  | 0  | 0  | 0  | 0  | 0  | 0  | 0  | 0  | 40 | 0  | 0  | 0  | 0  | 0  | 0  | 0  | 0  | 0  | 0  |
|            | 15 | 0             | 0  | 0  | 0  | 0  | 0  | 0  | 0  | 0  | 0  | 0  | 0  | 0  | 0  | 40 | 0  | 0  | 0  | 0  | 0  | 0  | 0  | 0  | 0  |
|            | 16 | 0             | 0  | 0  | 0  | 0  | 0  | 0  | 0  | 0  | 0  | 0  | 0  | 0  | 0  | 0  | 40 | 0  | 0  | 0  | 0  | 0  | 0  | 0  | 0  |
|            | 17 | 0             | 0  | 0  | 0  | 0  | 0  | 1  | 0  | 0  | 0  | 0  | 0  | 0  | 0  | 0  | 0  | 39 | 0  | 0  | 0  | 0  | 0  | 0  | 0  |
|            | 18 | 0             | 0  | 0  | 0  | 0  | 0  | 0  | 0  | 0  | 0  | 0  | 0  | 0  | 0  | 0  | 0  | 0  | 28 | 12 | 0  | 0  | 0  | 0  | 0  |
|            | 19 | 0             | 0  | 0  | 0  | 0  | 0  | 0  | 0  | 0  | 0  | 0  | 0  | 0  | 0  | 0  | 0  | 5  | 35 | 0  | 0  | 0  | 0  | 0  | 0  |
|            | 20 | 0             | 0  | 0  | 18 | 0  | 0  | 0  | 0  | 0  | 0  | 5  | 0  | 4  | 0  | 0  | 0  | 0  | 0  | 0  | 13 | 0  | 0  | 0  | 0  |
|            | 21 | 0             | 0  | 0  | 0  | 0  | 0  | 0  | 0  | 0  | 0  | 0  | 0  | 0  | 0  | 0  | 0  | 0  | 0  | 0  | 0  | 40 | 0  | 0  | 0  |
|            | 22 | 0             | 0  | 0  | 0  | 0  | 0  | 0  | 0  | 0  | 0  | 0  | 0  | 0  | 0  | 0  | 0  | 0  | 0  | 0  | 0  | 0  | 40 | 0  | 0  |
|            | 23 | 0             | 0  | 0  | 0  | 0  | 0  | 0  | 0  | 0  | 0  | 0  | 0  | 0  | 0  | 0  | 0  | 0  | 0  | 0  | 0  | 0  | 0  | 40 | 0  |
|            | 24 | 0             | 0  | 0  | 0  | 0  | 0  | 0  | 0  | 0  | 0  | 0  | 0  | 0  | 0  | 0  | 0  | 0  | 0  | 0  | 0  | 0  | 0  | 0  | 40 |

Table A1 confusion matrix of the SEIL method

Table A2 confusion matrix of the WS method

|            |    | Predict class |    |    |    |    |    |    |    |    |    |    |    |    |    |    |    |    |    |    |    |    |    |    |    |
|------------|----|---------------|----|----|----|----|----|----|----|----|----|----|----|----|----|----|----|----|----|----|----|----|----|----|----|
|            |    | 1             | 2  | 3  | 4  | 5  | 6  | 7  | 8  | 9  | 10 | 11 | 12 | 13 | 14 | 15 | 16 | 17 | 18 | 19 | 20 | 21 | 22 | 23 | 24 |
| True class | 1  | 23            | 10 | 7  | 0  | 0  | 0  | 0  | 0  | 0  | 0  | 0  | 0  | 0  | 0  | 0  | 0  | 0  | 0  | 0  | 0  | 0  | 0  | 0  |    |
|            | 2  | 3             | 20 | 3  | 6  | 6  | 2  | 0  | 0  | 0  | 0  | 0  | 0  | 0  | 0  | 0  | 0  | 0  | 0  | 0  | 0  | 0  | 0  | 0  |    |
|            | 3  | 2             | 5  | 22 | 3  | 2  | 6  | 0  | 0  | 0  | 0  | 0  | 0  | 0  | 0  | 0  | 0  | 0  | 0  | 0  | 0  | 0  | 0  | 0  |    |
|            | 4  | 0             | 2  | 3  | 30 | 1  | 4  | 0  | 0  | 0  | 0  | 0  | 0  | 0  | 0  | 0  | 0  | 0  | 0  | 0  | 0  | 0  | 0  | 0  |    |
|            | 5  | 0             | 1  | 1  | 0  | 22 | 15 | 0  | 0  | 0  | 0  | 0  | 0  | 0  | 0  | 0  | 0  | 0  | 0  | 0  | 1  | 0  | 0  | 0  |    |
|            | 6  | 0             | 0  | 0  | 3  | 16 | 18 | 0  | 0  | 0  | 3  | 0  | 0  | 0  | 0  | 0  | 0  | 0  | 0  | 0  | 0  | 0  | 0  | 0  |    |
|            | 7  | 0             | 0  | 0  | 0  | 0  | 0  | 37 | 3  | 0  | 0  | 0  | 0  | 0  | 0  | 0  | 0  | 0  | 0  | 0  | 0  | 0  | 0  | 0  |    |
|            | 8  | 0             | 0  | 0  | 0  | 0  | 0  | 0  | 40 | 0  | 0  | 0  | 0  | 0  | 0  | 0  | 0  | 0  | 0  | 0  | 0  | 0  | 0  | 0  |    |
|            | 9  | 0             | 0  | 0  | 1  | 0  | 0  | 0  | 0  | 24 | 0  | 0  | 13 | 1  | 0  | 0  | 0  | 0  | 0  | 0  | 1  | 0  | 0  | 0  |    |
|            | 10 | 0             | 0  | 0  | 0  | 0  | 0  | 0  | 0  | 0  | 39 | 0  | 1  | 0  | 0  | 0  | 0  | 0  | 0  | 0  | 0  | 0  | 0  | 0  |    |
|            | 11 | 0             | 0  | 0  | 0  | 2  | 1  | 0  | 0  | 0  | 0  | 28 | 2  | 0  | 0  | 0  | 0  | 0  | 0  | 0  | 5  | 1  | 0  | 1  |    |
|            | 12 | 0             | 0  | 0  | 0  | 0  | 0  | 0  | 0  | 0  | 0  | 0  | 39 | 0  | 0  | 0  | 0  | 0  | 0  | 0  | 0  | 1  | 0  | 0  |    |
|            | 13 | 0             | 0  | 0  | 0  | 0  | 0  | 0  | 0  | 0  | 0  | 0  | 0  | 39 | 1  | 0  | 0  | 0  | 0  | 0  | 0  | 0  | 0  | 0  |    |
|            | 14 | 0             | 0  | 0  | 0  | 0  | 0  | 0  | 0  | 0  | 0  | 0  | 0  | 0  | 40 | 0  | 0  | 0  | 0  | 0  | 0  | 0  | 0  | 0  |    |
|            | 15 | 0             | 0  | 0  | 0  | 0  | 0  | 0  | 0  | 0  | 0  | 0  | 0  | 0  | 0  | 40 | 0  | 0  | 0  | 0  | 0  | 0  | 0  | 0  |    |
|            | 16 | 0             | 0  | 0  | 0  | 0  | 0  | 0  | 0  | 0  | 1  | 0  | 0  | 0  | 1  | 38 | 0  | 0  | 0  | 0  | 0  | 0  | 0  | 0  |    |
|            | 17 | 0             | 0  | 0  | 0  | 0  | 0  | 0  | 0  | 1  | 0  | 0  | 0  | 0  | 1  | 0  | 38 | 0  | 0  | 0  | 0  | 0  | 0  | 0  |    |
|            | 18 | 0             | 0  | 0  | 0  | 0  | 0  | 0  | 0  | 0  | 0  | 0  | 0  | 0  | 0  | 0  | 0  | 26 | 14 | 0  | 0  | 0  | 0  | 0  |    |
|            | 19 | 0             | 0  | 0  | 0  | 0  | 0  | 0  | 0  | 0  | 0  | 0  | 0  | 0  | 0  | 0  | 0  | 11 | 29 | 0  | 0  | 0  | 0  | 0  |    |
|            | 20 | 0             | 0  | 0  | 0  | 0  | 0  | 0  | 0  | 0  | 5  | 0  | 1  | 0  | 0  | 0  | 0  | 0  | 0  | 0  | 34 | 0  | 0  | 0  |    |
|            | 21 | 0             | 0  | 0  | 0  | 0  | 0  | 0  | 0  | 0  | 1  | 0  | 0  | 1  | 0  | 0  | 0  | 0  | 0  | 0  | 0  | 38 | 0  | 0  |    |
|            | 22 | 0             | 0  | 0  | 0  | 0  | 0  | 0  | 0  | 0  | 0  | 0  | 0  | 0  | 0  | 0  | 0  | 0  | 0  | 0  | 0  | 0  | 40 | 0  |    |
|            | 23 | 0             | 0  | 0  | 0  | 0  | 0  | 0  | 0  | 0  | 0  | 0  | 0  | 0  | 0  | 0  | 0  | 0  | 0  | 0  | 0  | 0  | 0  | 40 |    |
|            | 24 | 0             | 0  | 0  | 0  | 0  | 0  | 0  | 0  | 0  | 0  | 0  | 0  | 0  | 0  | 0  | 0  | 0  | 0  | 0  | 1  | 0  | 0  | 39 |    |

|            |    | Predict class |    |    |    |    |    |    |    |    |    |    |    |    |    |    |    |    |    |    |    |    |    |    |    |
|------------|----|---------------|----|----|----|----|----|----|----|----|----|----|----|----|----|----|----|----|----|----|----|----|----|----|----|
|            |    | 1             | 2  | 3  | 4  | 5  | 6  | 7  | 8  | 9  | 10 | 11 | 12 | 13 | 14 | 15 | 16 | 17 | 18 | 19 | 20 | 21 | 22 | 23 | 24 |
| True class | 1  | 40            | 0  | 0  | 0  | 0  | 0  | 0  | 0  | 0  | 0  | 0  | 0  | 0  | 0  | 0  | 0  | 0  | 0  | 0  | 0  | 0  | 0  | 0  | 0  |
|            | 2  | 1             | 25 | 0  | 0  | 13 | 1  | 0  | 0  | 0  | 0  | 0  | 0  | 0  | 0  | 0  | 0  | 0  | 0  | 0  | 0  | 0  | 0  | 0  | 0  |
|            | 3  | 0             | 0  | 40 | 0  | 0  | 0  | 0  | 0  | 0  | 0  | 0  | 0  | 0  | 0  | 0  | 0  | 0  | 0  | 0  | 0  | 0  | 0  | 0  | 0  |
|            | 4  | 0             | 0  | 0  | 39 | 0  | 1  | 0  | 0  | 0  | 0  | 0  | 0  | 0  | 0  | 0  | 0  | 0  | 0  | 0  | 0  | 0  | 0  | 0  | 0  |
|            | 5  | 1             | 0  | 0  | 0  | 38 | 1  | 0  | 0  | 0  | 0  | 0  | 0  | 0  | 0  | 0  | 0  | 0  | 0  | 0  | 0  | 0  | 0  | 0  | 0  |
|            | 6  | 0             | 0  | 4  | 0  | 1  | 35 | 0  | 0  | 0  | 0  | 0  | 0  | 0  | 0  | 0  | 0  | 0  | 0  | 0  | 0  | 0  | 0  | 0  | 0  |
|            | 7  | 0             | 0  | 0  | 0  | 0  | 0  | 40 | 0  | 0  | 0  | 0  | 0  | 0  | 0  | 0  | 0  | 0  | 0  | 0  | 0  | 0  | 0  | 0  | 0  |
|            | 8  | 0             | 0  | 0  | 0  | 0  | 0  | 0  | 40 | 0  | 0  | 0  | 0  | 0  | 0  | 0  | 0  | 0  | 0  | 0  | 0  | 0  | 0  | 0  | 0  |
|            | 9  | 0             | 0  | 0  | 0  | 0  | 0  | 0  | 0  | 40 | 0  | 0  | 0  | 0  | 0  | 0  | 0  | 0  | 0  | 0  | 0  | 0  | 0  | 0  | 0  |
|            | 10 | 0             | 0  | 0  | 0  | 0  | 0  | 0  | 0  | 0  | 40 | 0  | 0  | 0  | 0  | 0  | 0  | 0  | 0  | 0  | 0  | 0  | 0  | 0  | 0  |
|            | 11 | 0             | 0  | 1  | 0  | 0  | 0  | 0  | 0  | 0  | 0  | 35 | 0  | 0  | 4  | 0  | 0  | 0  | 0  | 0  | 0  | 0  | 0  | 0  | 0  |
|            | 12 | 0             | 0  | 0  | 0  | 0  | 0  | 0  | 0  | 0  | 0  | 0  | 40 | 0  | 0  | 0  | 0  | 0  | 0  | 0  | 0  | 0  | 0  | 0  | 0  |
|            | 13 | 0             | 0  | 0  | 0  | 0  | 0  | 0  | 0  | 0  | 0  | 0  | 0  | 30 | 0  | 0  | 0  | 0  | 0  | 0  | 0  | 10 | 0  | 0  | 0  |
|            | 14 | 0             | 0  | 0  | 0  | 0  | 0  | 0  | 0  | 0  | 0  | 0  | 0  | 0  | 39 | 0  | 0  | 0  | 0  | 0  | 0  | 0  | 1  | 0  | 0  |
|            | 15 | 0             | 0  | 0  | 0  | 0  | 0  | 0  | 0  | 0  | 0  | 0  | 0  | 0  | 0  | 40 | 0  | 0  | 0  | 0  | 0  | 0  | 0  | 0  | 0  |
|            | 16 | 0             | 0  | 0  | 0  | 0  | 0  | 0  | 0  | 0  | 0  | 0  | 0  | 0  | 0  | 0  | 40 | 0  | 0  | 0  | 0  | 0  | 0  | 0  | 0  |
|            | 17 | 0             | 0  | 0  | 0  | 0  | 0  | 3  | 0  | 0  | 0  | 0  | 0  | 0  | 0  | 0  | 0  | 37 | 0  | 0  | 0  | 0  | 0  | 0  | 0  |
|            | 18 | 0             | 0  | 0  | 0  | 0  | 0  | 0  | 0  | 0  | 0  | 0  | 0  | 0  | 0  | 0  | 0  | 0  | 40 | 0  | 0  | 0  | 0  | 0  | 0  |
|            | 19 | 0             | 0  | 0  | 0  | 0  | 0  | 0  | 0  | 0  | 0  | 0  | 0  | 0  | 0  | 0  | 0  | 0  | 3  | 37 | 0  | 0  | 0  | 0  | 0  |
|            | 20 | 0             | 0  | 0  | 0  | 2  | 0  | 0  | 0  | 0  | 0  | 2  | 0  | 9  | 0  | 0  | 0  | 0  | 0  | 0  | 27 | 0  | 0  | 0  | 0  |
|            | 21 | 0             | 0  | 0  | 0  | 0  | 0  | 0  | 0  | 0  | 0  | 0  | 0  | 0  | 0  | 0  | 0  | 0  | 0  | 0  | 40 | 0  | 0  | 0  | 0  |
|            | 22 | 0             | 0  | 0  | 0  | 0  | 0  | 0  | 0  | 0  | 0  | 0  | 0  | 0  | 0  | 0  | 0  | 0  | 0  | 0  | 0  | 40 | 0  | 0  | 0  |
|            | 23 | 0             | 0  | 0  | 0  | 0  | 0  | 0  | 0  | 0  | 0  | 0  | 0  | 0  | 0  | 0  | 0  | 0  | 0  | 0  | 0  | 0  | 40 | 0  | 0  |
|            | 24 | 0             | 0  | 0  | 0  | 0  | 0  | 0  | 0  | 0  | 0  | 0  | 0  | 0  | 0  | 0  | 0  | 0  | 0  | 0  | 0  | 0  | 0  | 0  | 40 |

Table A3 confusion matrix of the PIC method
